# Supplementary material for: Consumption of JUUL vs. Other E-Cigarette Brands among U.S. E-Cigarette Users: Evidence from Wave 5 of the PATH Study
Source: MDPI journal article supplement (doi:10.3390/ijerph191710837), 2022-08-31
Supplement: s1 [file s1]

**Figure S1. Proportion of respondents who knew the e-cigarette brand names they frequently/last used among U.S. youth, young adult, and adult past 30-day e-cigarette users in 2019 (PATH Wave 5).**

1a. Youth (Unweighted frequency: 390 youth reported the brand names of e-cigarette they usually/last used, 243 reported JUUL.)

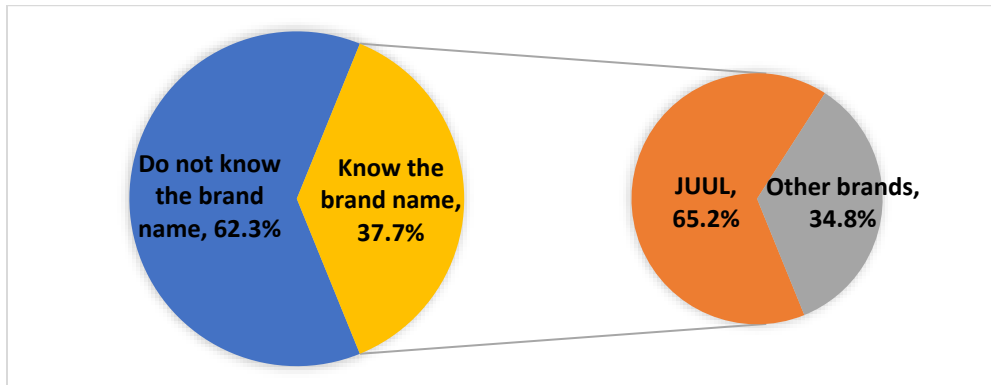

1b. Young adults (Unweighted frequency: 1,183 young adults reported the brand names of e-cigarette they usually/last used, 699 reported JUUL)

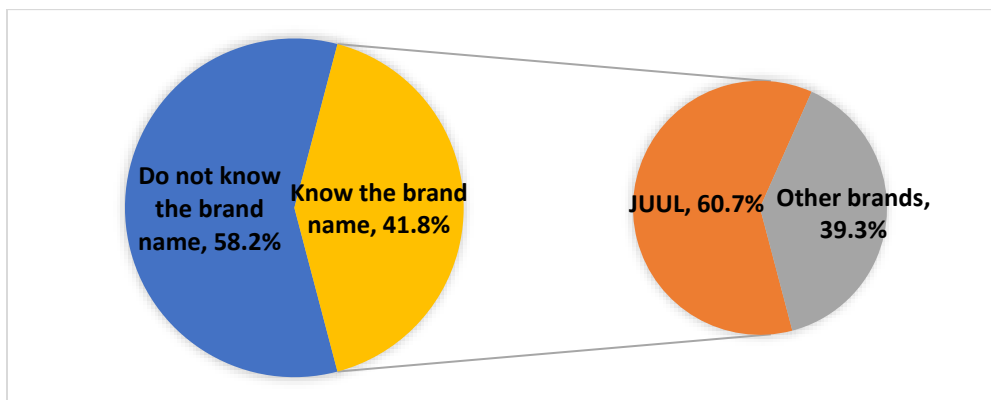

1c. Adults (Unweighted frequency: 996 adults reported the brand names of e-cigarette they usually/last used, 238 reported JUUL)

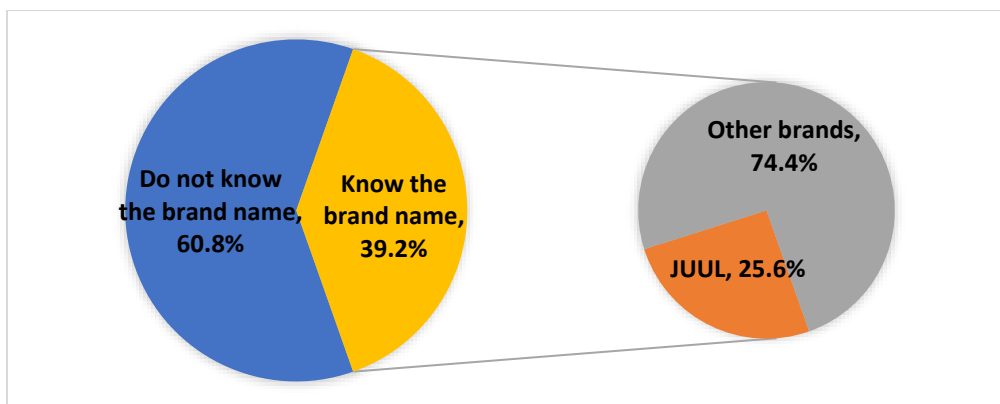

**Table S1. Descriptive statistics of past 30-day e-cigarette users who know the brand names they usually/last used among U.S. youth, young adults, and adults.**

| Individual characteristics       | Youth |             | Young adults |             | Adults |             |
|----------------------------------|-------|-------------|--------------|-------------|--------|-------------|
|                                  | %     | 95% CI      | %            | 95% CI      | %      | 95% CI      |
| Sex                              |       |             |              |             |        |             |
| Male                             | 54.2  | 48.9 - 59.5 | 62.3         | 59.1 - 65.4 | 54.9   | 51.0 - 58.7 |
| Female                           | 45.8  | 40.5 - 51.1 | 37.7         | 34.6 - 40.9 | 45.1   | 41.3 - 49.0 |
| Race/ethnicity                   |       |             |              |             |        |             |
| Non-Hispanic White               | 69.5  | 64.4 - 74.1 | 75.0         | 72.2 - 77.7 | 76.0   | 72.8 - 79.0 |
| Non-Hispanic Black               | 3.0   | 1.7 - 5.2   | 5.1          | 3.9 - 6.6   | 7.9    | 6.1 - 10.1  |
| Hispanic                         | 17.7  | 14.1 - 22.0 | 11.7         | 10.0 - 13.7 | 9.4    | 7.6 - 11.6  |
| Non-Hispanic other               | 9.8   | 7.0 - 13.5  | 8.2          | 6.5 - 10.3  | 6.7    | 5.1 - 8.6   |
| Education/Parental education     |       |             |              |             |        |             |
| Less than high school            | 11.3  | 8.4 - 15.0  | 13.7         | 11.7 - 15.9 | 14.4   | 12.2 - 17.0 |
| High school graduate             | 15.9  | 12.3 - 20.2 | 28.3         | 25.6 - 31.1 | 26.9   | 23.2 - 30.9 |
| Some college or associate degree | 32.8  | 28.0 - 37.9 | 47.4         | 44.2 - 50.7 | 37.9   | 34.5 - 41.6 |
| Bachelor's degree or above       | 40.1  | 34.9 - 45.5 | 10.7         | 8.6 - 13.1  | 20.7   | 17.9 - 23.9 |
| Cigarette smoking                |       |             |              |             |        |             |
| Yes                              | 23.7  | 19.5 - 28.4 | 29.8         | 26.9 - 32.9 | 52.8   | 48.9 - 56.7 |
| No                               | 76.3  | 71.6 - 80.5 | 70.2         | 67.1 - 73.1 | 47.2   | 43.3 - 51.1 |
| Other tobacco use                |       |             |              |             |        |             |
| Yes                              | 14.4  | 11.0 - 18.8 | 25.3         | 22.6 - 28.3 | 22.6   | 19.5 - 26.0 |
| No                               | 85.6  | 81.2 - 89.0 | 74.7         | 71.7 - 77.4 | 77.4   | 74.0 - 80.5 |
